# Supplementary material for: ARAG, an Antioxidant-Rich Gel, Shows Superiority to Mepilex Ag in the Treatment of Deep Partial Thickness Burns without Sacrificing Antimicrobial Efficiency
Source: MDPI journal article supplement (doi:10.3390/antiox12061176), 2023-05-30
Supplement: s1 [file s1]

## Supplementary Materials

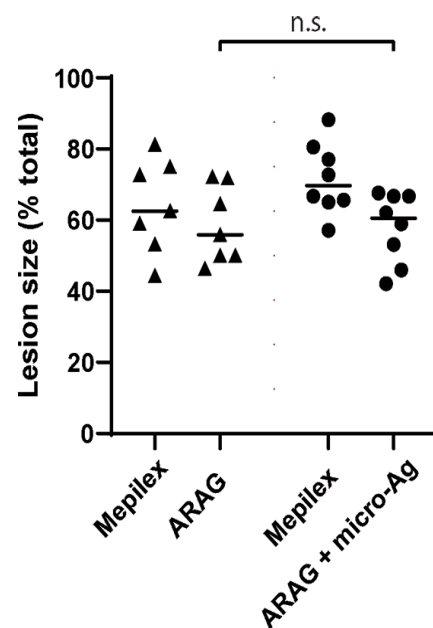

**Supplementary Figure S1: Addition of micronized-Ag to ARAG does not significantly influence wound healing.**

Burn studies of two pigs were conducted with ARAG alone while the other two pigs were conducted with ARAG + micronized-silver (micro-Ag). Paired comparison of ARAG (n=7) to ARAG + micronized-silver (n=8) shows that the two groups are not significantly different from each other by ANOVA with independent variable analysis. This supports the pooling analysis that is performed in **Figure 3**. n.s. = not significant
